# Supplementary material for: IL-10 and ARG-1 Concentrations in Bone Marrow and Peripheral Blood of Metastatic Neuroblastoma Patients Do Not Associate with Clinical Outcome
Source: Hindawi journal article supplement (doi:10.1155/2015/718975), 2015-01-01
Supplement: f1 [file 718975.f1.pdf]

# Supplemental Figure 1

**A**

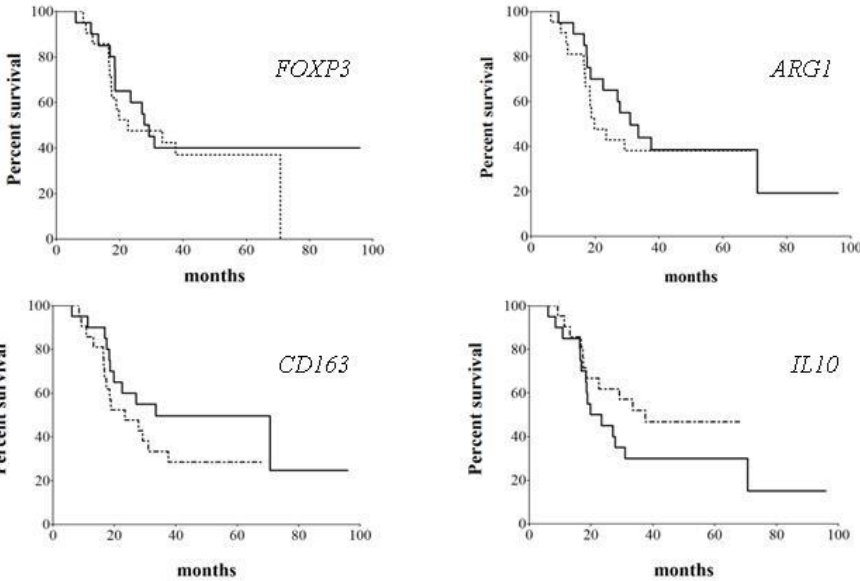

— below median  
..... above median

**B**

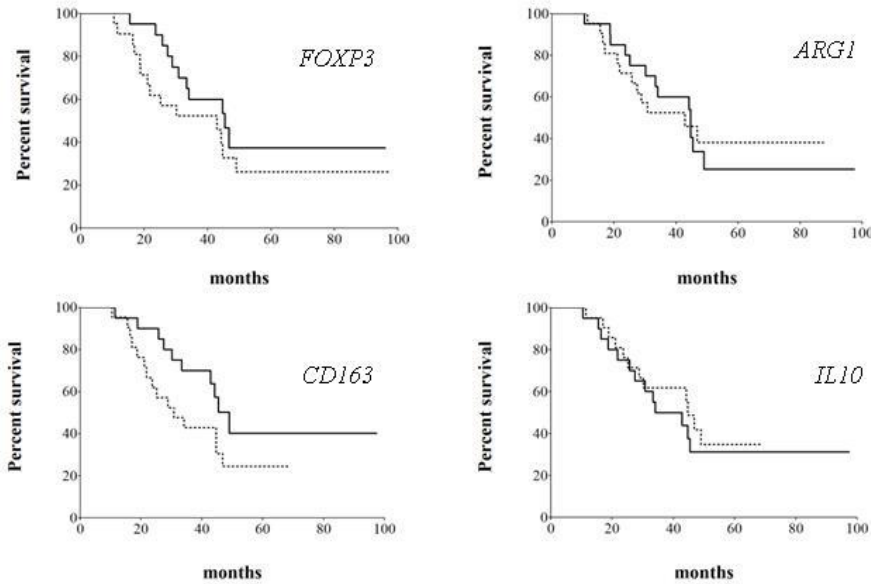

— below median  
..... above median

Supplemental Figure 2

A

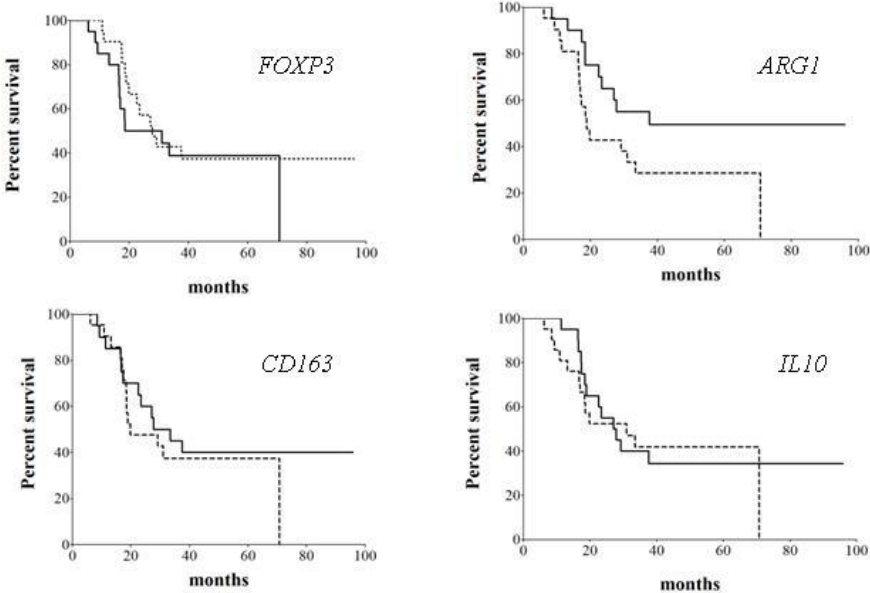

— below median  
..... above median

B

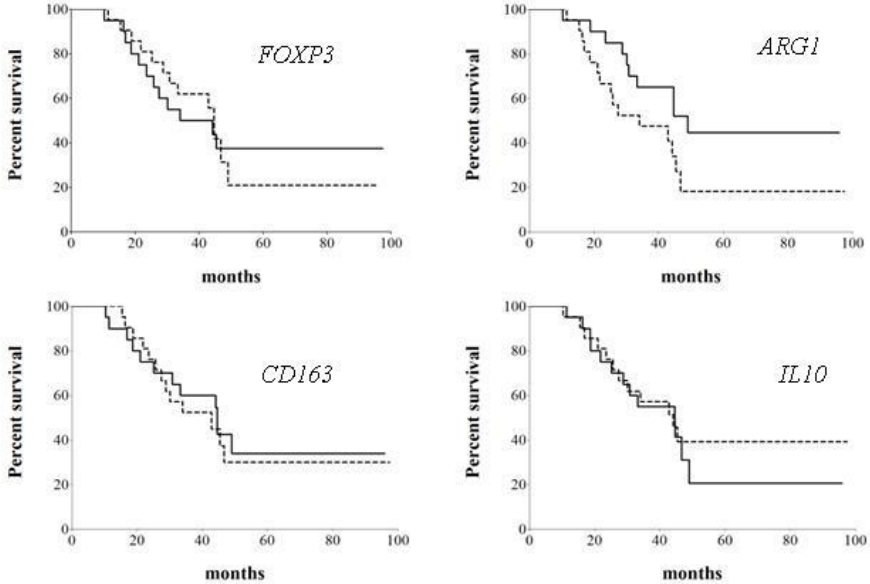

— below median  
..... above median

**Supplemental Figure 1.** Kaplan-Meier plot of EFS (**A**) and OS (**B**) obtained by stratifying the 41 stage 4 NB patients according to mRNA expression levels of *IL10*, *FOXP3*, *ARG1* and *CD163* in BM samples above (dotted line) or below (continuous line) median values. Y-axes represent % of event-free or alive patients, respectively. X-axes represent time of survival (months).

**Supplemental Figure 2.** Kaplan-Meier plot of EFS (**A**) and OS (**B**) obtained by stratifying the 41 stage 4 NB patients according to mRNA expression levels of *IL10*, *FOXP3*, *ARG1* and *CD163* in PB samples above (dotted line) or below (continuous line) median values. Y-axes represent % of event-free or alive patients, respectively. X-axes represent time of survival (months).
